# Supplementary material
Source: publisher figshare collection journal article supplement (https://sage.figshare.com/ndownloader/files/20450550)
Supplement: Supplementary file 1 [file 20450550]

**eTABLE 1:** Associations between themes of parental perspectives and overall experience: Results from Chi Squared Analysis

| Characteristic | Overall Sample | Neutral Experience | Positive Experience | Negative Experience | Tests of Independence |
| --- | --- | --- | --- | --- | --- |
| Diagnosing Provider | |  |  |  |  |
| Non-Physician | 188 | 70 | 70 | 48 | χ2 (2) = 10.14 |
| Physician | 42 | 5 | 23 | 14 | p=0.006 |
| Diagnostic Conflict | |  |  |  |  |
| No Conflict | 205 | 69 | 87 | 41 | χ2 (2) = 9.04 |
| Conflict | 25 | 6 | 6 | 13 | p=0.011 |
| Treatment Conflict | |  |  |  |  |
| No Conflict | 195 | 68 | 82 | 45 | χ2 (2) = 9.99 |
| Conflict | 35 | 7 | 11 | 17 | p=0.007 |
| Treatment Indecision | |  |  |  |  |
| No Indecision | 198 | 55 | 92 | 51 | χ2 (2) = 23.74 |
| Indecision | 32 | 20 | 1 | 11 | p=0.000 |
| Diagnostic Error | |  |  |  |  |
| Correctly diagnosed | 191 | 64 | 83 | 44 | χ2 (2) = 9.24 |
| Misdiagnosed | 39 | 11 | 10 | 18 | p=0.010 |
| Discomfort |  |  |  |  |  |
| Not mention | 150 | 57 | 63 | 30 | χ2 (4) = 20.40 |
| Child | 33 | 3 | 19 | 11 | p=0.000 |
| Mother | 46 | 15 | 11 | 20 |  |
| Breastfeeding |  |  |  |  |  |
| Not mention | 47 | 17 | 28 | 2 | χ2 (6) = 27.77 |
| Child | 51 | 11 | 26 | 14 | p=0.000 |
| Mother | 13 | 2 | 4 | 7 |  |
| Both | 119 | 45 | 35 | 39 |  |
| Speech Problems | |  |  |  |  |
| No comment | 202 | 72 | 73 | 57 | χ2 (2) = 13.24 |
| Comment | 28 | 3 | 20 | 5 | p=0.001 |
| Family History | |  |  |  |  |
| Not mention | 214 | 71 | 81 | 62 | χ2 (2) = 10.02 |
| Mentioned | 16 | 4 | 12 | 0 | p=0.007 |
| Surgical Outcome | |  |  |  |  |
| Neutral | 86 | 67 | 4 | 15 | χ2 (4) = 209.37 |
| Satisfied | 107 | 7 | 81 | 19 | p=0.000 |
| Dissatisfied | 25 | 0 | 0 | 25 |  |
| Nipple Shields | |  |  |  |  |
| Not mentioned | 199 | 68 | 84 | 47 | χ2 (2) = 8.36 |
| Mentioned | 31 | 7 | 9 | 15 | p=0.015 |
